# Supplementary material for: Mutations in Nonessential eIF3k and eIF3l Genes Confer Lifespan Extension and Enhanced Resistance to ER Stress in Caenorhabditis elegans
Source: PubMed Central journal article supplement (PMC5045169; doi:10.1371/journal.pgen.1006326), 2016-09-30
Supplement: pgen.1006326.s001.pdf [file pgen.1006326.s001.pdf]

| <b>Sample</b>                     | <b><i>C. elegans</i></b><br><b>CDS reads</b> | <b><i>S. cerevisiae</i></b><br><b>CDS reads</b> | <b>Ratio</b> |
|-----------------------------------|----------------------------------------------|-------------------------------------------------|--------------|
| WT replicate 1                    | 10283353                                     | 574131                                          | 17.91        |
| WT replicate 2                    | 12581951                                     | 575114                                          | 21.88        |
| <i>eif-3.K(qd213)</i> replicate 1 | 9829209                                      | 459678                                          | 21.38        |
| <i>eif-3.K(qd213)</i> replicate 2 | 8902662                                      | 434957                                          | 20.47        |
| <i>eif-3.K(gk126)</i> replicate 1 | 6870555                                      | 374967                                          | 18.32        |
| <i>eif-3.K(gk126)</i> replicate 2 | 8286071                                      | 449641                                          | 18.43        |
