# Supplementary material for: Mutations in Nonessential eIF3k and eIF3l Genes Confer Lifespan Extension and Enhanced Resistance to ER Stress in Caenorhabditis elegans
Source: PubMed Central journal article supplement (PMC5045169; doi:10.1371/journal.pgen.1006326), 2016-09-30
Supplement: pgen.1006326.s002.pdf [file pgen.1006326.s002.pdf]

**Table S2.**

**Statistics for lifespan experiments.**

***eif-3.K/eif-3.L* Longevity Experiments, *daf-16* epistasis**

| Experiment                          | Genotype                            | Mean lifespan ± SEM | P value vs control (Log rank test) | Percent Increase vs. Control | Number of worms | Comments                                    |
|-------------------------------------|-------------------------------------|---------------------|------------------------------------|------------------------------|-----------------|---------------------------------------------|
| 1                                   | N2                                  | 13.3 ± 0.2          | Control                            | Control                      | 83/90           | Performed at 25°C                           |
|                                     | <i>eif-3.K(qd213)</i>               | 19.7 ± 0.3          | < 0.0001                           | 48.1                         | 80/90           |                                             |
|                                     | <i>eif-3.K(gk126)</i>               | 19.6 ± 0.3          | < 0.0001                           | 47.4                         | 81/90           |                                             |
| 2                                   | N2                                  | 14.8 ± 0.2          | Control                            | Control                      | 85/90           | Performed at 25°C<br>Presented in Figure 2C |
|                                     | <i>eif-3.K(qd213)</i>               | 20.4 ± 0.4          | < 0.0001                           | 37.8                         | 88/90           |                                             |
|                                     | <i>eif-3.K(gk126)</i>               | 19.3 ± 0.3          | < 0.0001                           | 30.4                         | 89/90           |                                             |
|                                     | <i>eif-3.L(gk485491)</i>            | 19.3 ± 0.4          | < 0.0001                           | 30.4                         | 87/90           |                                             |
|                                     | <i>daf-16(mu86)</i>                 | 9.8 ± 0.1           | Control                            | Control                      | 89/90           |                                             |
| <i>daf-16(mu86); eif-3.K(gk126)</i> | 10.2 ± 0.1                          | 0.0132              | 4.1                                | 85/90                        |                 |                                             |
| 3                                   | N2                                  | 15.4 ± 0.2          | Control                            | Control                      | 83/90           | Performed at 25°C                           |
|                                     | <i>eif-3.K(qd213)</i>               | 21.0 ± 0.3          | < 0.0001                           | 36.4                         | 88/90           |                                             |
|                                     | <i>eif-3.K(gk126)</i>               | 19.6 ± 0.4          | < 0.0001                           | 27.3                         | 85/90           |                                             |
|                                     | <i>eif-3.L(gk485491)</i>            | 20.6 ± 0.5          | < 0.0001                           | 33.8                         | 78/90           |                                             |
|                                     | <i>daf-16(mu86)</i>                 | 9.9 ± 0.1           | Control                            | Control                      | 90/90           |                                             |
| <i>daf-16(mu86); eif-3.K(gk126)</i> | 9.8 ± 0.1                           | 0.7288              | -1.0                               | 83/90                        |                 |                                             |
| 4                                   | N2                                  | 15.5 ± 0.2          | Control                            | Control                      | 85/90           | Performed at 25°C<br>Presented in Figure 2A |
|                                     | <i>eif-3.K(qd213)</i>               | 23.0 ± 0.3          | < 0.0001                           | 48.4                         | 79/90           |                                             |
|                                     | <i>eif-3.K(gk126)</i>               | 21.9 ± 0.4          | < 0.0001                           | 41.3                         | 72/90           |                                             |
|                                     | <i>eif-3.L(qd310)</i>               | 21.9 ± 0.4          | < 0.0001                           | 41.3                         | 75/90           |                                             |
|                                     | <i>eif-3.L(gk485491)</i>            | 22.7 ± 0.5          | < 0.0001                           | 46.5                         | 71/90           |                                             |
| 5                                   | N2                                  | 18.3 ± 0.6          | Control                            | Control                      | 48/90           | Performed at 20°C                           |
|                                     | <i>eif-3.K(qd213)</i>               | 26.1 ± 0.5          | < 0.0001                           | 42.6                         | 78/90           |                                             |
|                                     | <i>eif-3.K(gk126)</i>               | 25.3 ± 0.5          | < 0.0001                           | 38.3                         | 85/90           |                                             |
|                                     | <i>daf-16(mu86)</i>                 | 11.7 ± 0.2          | Control                            | Control                      | 79/90           |                                             |
|                                     | <i>daf-16(mu86); eif-3.K(gk126)</i> | 12.5 ± 0.2          | 0.0156                             | 6.8                          | 86/90           |                                             |
| 6                                   | N2                                  | 21.3 ± 0.5          | Control                            | Control                      | 47/90           | Performed at 20°C                           |
|                                     | <i>eif-3.K(qd213)</i>               | 34.4 ± 0.9          | < 0.0001                           | 61.5                         | 75/90           |                                             |
|                                     | <i>eif-3.K(gk126)</i>               | 27.4 ± 0.6          | < 0.0001                           | 28.6                         | 82/90           |                                             |
|                                     | <i>daf-16(mu86)</i>                 | 12.7 ± 0.2          | Control                            | Control                      | 76/90           |                                             |
| <i>daf-16(mu86); eif-3.K(gk126)</i> | 13.1 ± 0.2                          | 0.1572              | 3.1                                | 80/90                        |                 |                                             |

**RNAi Experiments**

|   |                                              |            |          |         |       |                                             |
|---|----------------------------------------------|------------|----------|---------|-------|---------------------------------------------|
| 7 | <i>eif-3.K(qd213)</i> on GFP RNAi            | 24.6 ± 0.5 | Control  | Control | 89/90 | Performed at 20°C<br>Presented in Figure 2B |
|   | <i>eif-3.K(qd213)</i> on <i>eif-3.A</i> RNAi | 32.6 ± 0.5 | < 0.0001 | 32.5    | 87/90 |                                             |
|   | <i>eif-3.K(gk126)</i> on GFP RNAi            | 23.3 ± 0.4 | Control  | Control | 88/90 |                                             |
|   | <i>eif-3.K(gk126)</i> on <i>eif-3.A</i> RNAi | 33.6 ± 0.6 | < 0.0001 | 44.2    | 82/90 |                                             |
| 8 | <i>eif-3.K(qd213)</i> on GFP RNAi            | 24.3 ± 0.5 | Control  | Control | 87/90 | Performed at 20°C                           |
|   | <i>eif-3.K(qd213)</i> on <i>eif-3.A</i> RNAi | 35.0 ± 0.7 | < 0.0001 | 44.0    | 80/90 |                                             |
|   | <i>eif-3.K(gk126)</i> on GFP RNAi            | 22.6 ± 0.5 | Control  | Control | 89/90 |                                             |
|   | <i>eif-3.K(gk126)</i> on <i>eif-3.A</i> RNAi | 33.3 ± 0.8 | < 0.0001 | 47.3    | 89/90 |                                             |
| 9 | <i>eif-3.K(qd213)</i> on GFP RNAi            | 24.0 ± 0.4 | Control  | Control | 89/90 | Performed at 20°C                           |
|   | <i>eif-3.K(qd213)</i> on <i>eif-3.A</i> RNAi | 33.5 ± 0.7 | < 0.0001 | 39.6    | 88/90 |                                             |
|   | <i>eif-3.K(gk126)</i> on GFP RNAi            | 24.2 ± 0.4 | Control  | Control | 90/90 |                                             |
|   | <i>eif-3.K(gk126)</i> on <i>eif-3.A</i> RNAi | 34.8 ± 0.7 | < 0.0001 | 43.8    | 89/90 |                                             |
