# Supplementary material for: Mutations in Nonessential eIF3k and eIF3l Genes Confer Lifespan Extension and Enhanced Resistance to ER Stress in Caenorhabditis elegans
Source: PubMed Central journal article supplement (PMC5045169; doi:10.1371/journal.pgen.1006326), 2016-09-30

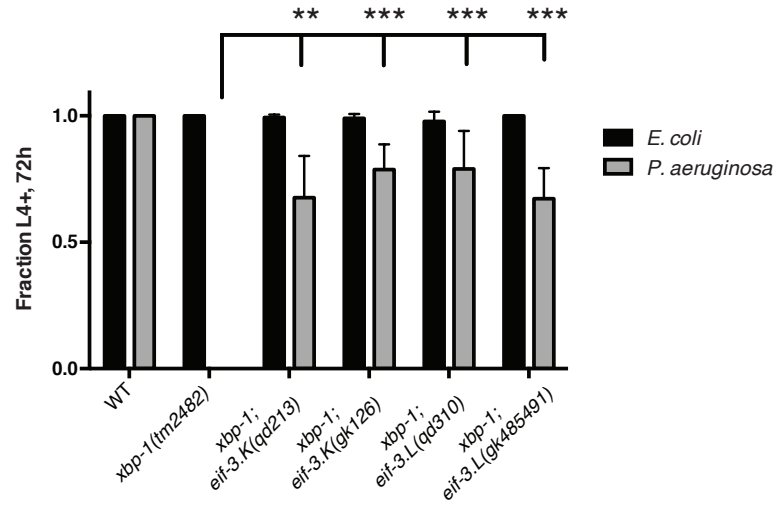

Supplement: pgen.1006326.s003.pdf [file pgen.1006326.s003.pdf]
